# Supplementary material for: Genomic Confirmation of the P-IIIe Subclass of Snake Venom Metalloproteinases and Characterisation of Its First Member, a Disintegrin-Like/Cysteine-Rich Protein
Source: MDPI journal article supplement (doi:10.3390/toxins14040232), 2022-03-23
Supplement: s1 [file s1]

## Article

# Genomic Confirmation of the P-II<sub>e</sub> Subclass of Snake Venom Metalloproteinases and Characterisation of Its First Member, a Disintegrin-Like/Cysteine-Rich Protein

Kity Požek, Adrijana Leonardi, Jože Pungerčar, Weiqiao Rao, Zijian Gao, Siqi Liu, Andreas Hougaard Laustsen, Alenka Trampuš Bakija, Katarina Reberšek, Helena Podgornik and Igor Kržaj

| VaaMPIII-2 CDS |   |           |             | VaaMPIII-3 CDS |     |           |             |
|----------------|---|-----------|-------------|----------------|-----|-----------|-------------|
|                |   | Exon (bp) | Intron (bp) |                |     | Exon (bp) | Intron (bp) |
| Exon 1         | > | 52        |             | >              | 52  |           |             |
| Intron 1 (1)   |   |           | 2084        |                |     |           | 2295        |
| Exon 2         |   | 107       |             |                | 107 |           |             |
| Intron 2 (0)   |   |           | 975         |                |     |           | 883         |
| Exon 3         |   | 71        |             |                | 71  |           |             |
| Intron 3 (2)   |   |           | 1835        |                |     |           | 2309        |
| Exon 4         |   | 79        |             |                | 79  |           |             |
| Intron 4 (0)   |   |           | 1111        |                |     |           | 837         |
| Exon 5         |   | 77        |             |                | 77  |           |             |
| Intron 5 (2)   |   |           | 660         |                |     |           | 4391        |
| Exon 6         |   | 196       |             |                | 127 |           |             |
| Intron 6 (0)   |   |           | 2281        |                |     |           | 1916        |
| Exon 7         |   | 57        |             |                |     |           |             |
| Intron 7 (0)   |   |           | 655         |                |     |           |             |
| Exon 8         |   | 72        |             |                |     |           |             |
| Intron 8 (0)   |   |           | 2195        |                |     |           |             |
| Exon 9         |   | 170       |             |                |     |           |             |
| Intron 9 (2)   |   |           | 1408        |                |     |           |             |
| Exon 10        |   | 85        |             |                |     |           |             |
| Intron 10 (0)  |   |           | 306         |                |     |           |             |
| Exon 11        |   | 128       |             |                |     |           |             |
| Intron 11 (2)  |   |           | 2755        |                |     |           |             |
| Exon 12        |   | 178       |             |                |     |           |             |
| Intron 12 (0)  |   |           | 830         |                |     |           |             |
| Exon 13        |   | 90        |             |                |     |           |             |
| Intron 13 (0)  |   |           | 1057        |                |     |           |             |
| Exon 14        |   | 196       |             |                | 196 |           |             |
| Intron 14 (1)  |   |           | 2307        |                |     |           | 2619        |
| Exon 15        |   | 103       |             |                | 103 |           |             |
| Intron 15 (2)  |   |           | 7931        |                |     |           | 5870        |
| Exon 16        |   | 133       |             |                | 118 |           |             |
| Intron 16 (0)  |   |           | 545         |                |     |           | 1038        |
| Exon 17        | > | 48        |             | >              | 45  |           |             |
| Σ exons        |   | 1842      |             | 975            |     |           |             |
| Σ introns      |   | 28935     |             | 22158          |     |           |             |

**Figure S1.** Exon and intron lengths, and intron phases in the VaaMPIII-2 and VaaMPIII-3 genes. Intron phase is shown in parentheses (0, 1 or 2). Intron phases in VaaMPIII-2: 1,0,2,0,2,0,0,0,2,0,2,0,0,1,2,0; and in VaaMPIII-3: 1,0,2,0,2,-,-,-,-,-,-,-,0,1,2,0 (dashes denote missing introns according to VaaMPIII-2).

| N-terminal sequencing | LC-ESI-MS/MS                                                                                                                                                                     | NCBI accession number |
|-----------------------|----------------------------------------------------------------------------------------------------------------------------------------------------------------------------------|-----------------------|
| RAGTECRPARSECDVAEYC   | (R)KENDVPIPCAPEDIK(C),<br>(R)KENDVPIPCAPEDIKCGR(L),<br>(K)ENDVPIPCAPEDIKCGR(L),<br>(R)LFCELIKNTCK(Y),<br>(K)YDYSEDPDYGMVDHGTK(C),<br>(K)NTCKYDYSEDPDYGMVDHGTK(C),<br>(R)HCVDVTAY | MG958499              |

RAGTECRPARSECDVAEYCTGQSAECPTDVFHSNGKPCLNFGYCYNGNCPIMYHQCYALFG  
 PNATVGQDGCFEWNKKGESYFYCRKENDVPIPCAPEDIKCGRLFCELIKNTCKYDYSEDPDY  
 GMVDHGTKCGDGKVCINRHCVDVTAY

**Figure S2.** Structural identification of the isolated protein as VaaMPIII-3. After reduction and alkylation of Cys residues, one part of the isolated protein was N-terminally sequenced, and the other fragmented with trypsin and subjected to tandem mass spectrometry analysis (LC-ESI-MS/MS). Sequences of seven tryptic peptides were determined. All sequenced parts of the isolated protein are displayed in the table and correspond to VaaMPIII-3 (NCBI accession number: MG958499). On the primary structure of VaaMPIII-3, the identified parts of the sequence (49%) are typed either on black (Edman analysis) or gray background (MS analysis).

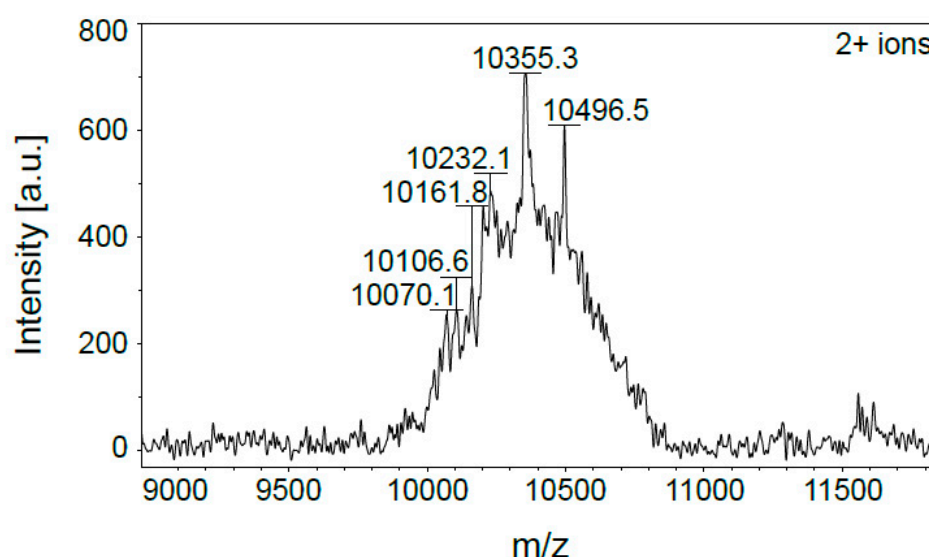

**Figure S3.** Mass spectroscopy of VaaMPIII-3. The VaaMPIII-3 sample was analysed using UltrafleX-treme III MALDI-TOF/TOF mass spectrometer (Bruker, Billerica, MA, USA). Only doubly charged VaaMPIII-3 ions are shown, where the existence of multiple glycoforms of this protein is nicely visible.
